# Supplementary material for: Whole Genome Sequence of the Treponema Fribourg-Blanc: Unspecified Simian Isolate Is Highly Similar to the Yaws Subspecies
Source: PLoS Negl Trop Dis. 2013 Apr 18;7(4):e2172. doi: 10.1371/journal.pntd.0002172 (PMC3630124; doi:10.1371/journal.pntd.0002172)
Supplement: Table S2 — List of specific differences between the Fribourg-Blanc (FB) genome and genomes of 3 strains of Treponema pallidum ssp. pertenue (TPE; Samoa D, CDC-2 and Gauthier). (XLS) [file pntd.0002172.s002.xls]

## Sheet: Supplement_Table_S2
Supplement_Table S2:
List of specific differences between the Fribourg-Blanc (FB) genome and genomes of 3 strains of Treponema pallidum ssp. pertenue (TPE; Samoa D, CDC-2 and Gauthier)
Position in the FB genome	Nucleotide in the FB genome	Nucleotide in TPE genomes	Intergenic/coding sequence in TPE (FB) genomes	Affected gene	Intergenic or minoacid difference or frameshift mutation	Conservative/nonconservative aminoacid difference	Aminoacid in FB protein	Aminoacid in TPE proteins	Polymorphism type FB vs. TPE
6654	T	C	coding	TPFB_0005	NON	nonconservative	I	T	SNP
10189	T	G	intergenic		IGR				SNP
12478	(G)9	(G)10	coding	TPFB_0012	frameshift				1 bp deletion
20705	A	G	coding	TPFB_0018	NON	nonconservative	Y	C	SNP
49367	G	-	coding	TPFB_0040	INS-frameshift				5 bp insertion
49368	G	-	coding	TPFB_0040
49369	G	-	coding	TPFB_0040
49370	G	-	coding	TPFB_0040
49371	G	-	coding	TPFB_0040
94715	(C)9	(C)10	intergenic		IGR				1 bp deletion
107247	C	T	coding	TPFB_0098	NON	nonconservative	G	D	SNP
120287	A	G	coding	TPFB_0106	SYN				SNP
134966	C	G	coding	TPFB_0117	NON	nonconservative	E	Q	SNP
134967	G	A	coding	TPFB_0117	SYN		S	S	SNP
134969	C	T	coding	TPFB_0117	NON	nonconservative	A	T	SNP
134973	G	A	coding	TPFB_0117	SYN		G	G	SNP
135229	A	G	coding	TPFB_0117	NON	nonconservative	L	S	SNP
135230	G	A	coding	TPFB_0117					SNP
135245	C	T	coding	TPFB_0117	NON	nonconservative	D	N	SNP
135250	A	G	coding	TPFB_0117	NON	nonconservative	L	P	SNP
135254	G	A	coding	TPFB_0117	NON	nonconservative	H	Y	SNP
135640	G	A	coding	TPFB_0117	NON	nonconservative	P	L	SNP
135643	A	G	coding	TPFB_0117	NON	conservative	V	A	SNP
135655	G	A	coding	TPFB_0117	NON	nonconservative	P	L	SNP
135766	A	G	coding	TPFB_0117	NON	nonconservative	L	P	SNP
135787	T	C	coding	TPFB_0117	NON	nonconservative	E	G	SNP
135796	C	T	coding	TPFB_0117	NON	nonconservative	R	Q	SNP
135851	T	C	coding	TPFB_0117	NON	nonconservative	T	A	SNP
135854	C	T	coding	TPFB_0117	NON	nonconservative	D	N	SNP
136103	C	T	coding	TPFB_0117	NON	nonconservative	A	T	SNP
136743	T	C	intergenic		IGR				SNP
148979	C	T	coding	TPFB_0126a	NON	nonconservative	R	G	SNP
148981	T	C	coding	TPFB_0126a					SNP
148982	G	T	coding	TPFB_0126a/TPFB_0126b	NON	nonconservative	G/start codon mutation	Q/start codon mutation	SNP
148983	C	T	coding	TPFB_0126a/TPFB_0126b					SNP
148984	C	G	coding	TPFB_0126a/TPFB_0126b					SNP
148985	T	C	coding (intergenic)	TPFB_0126a/TPFB_0126b	SYN/IGR		E	E	SNP
176235	A	C	coding	TPFB_0152	SYN/NON	/nonconservative	A/S	A	SNP
199631	G	-	coding	TPFB_0179	INZ		P	-	3 bp insertion
199632	G	-	coding	TPFB_0179
199633	G	-	coding	TPFB_0179
211401	G	A	coding	TPFB_0200	NON	nonconservative	E	K	SNP
233523	A	G	intergenic*		IGR*				SNP
254472	A	G	coding	TPFB_0242	SYN		A	A	SNP
258570	T	A	coding	TPFB_0245	NON	nonconservative	C	S	SNP
281925	A	G	intergenic		IGR				SNP
295328	G	-	coding	TPFB_0279	INZ		G	-	3 bp insertion
295329	G	-	coding	TPFB_0279
295330	G	-	coding	TPFB_0279
319012	G	A	coding	TPFB_0303	NON	stop codon mutation resulting in fusion of 2 genes	Q	*	SNP
319401	G	A	coding	TPFB_0303	NON	nonconservative	P	L	SNP
321132	T	C	coding	TPFB_0303	NON	nonconservative	D	G	SNP
332557	C	T	coding	TPFB_0316	NON	nonconservative	D	N	SNP
332562	A	G	coding	TPFB_0316	NON	nonconservative	L	P	SNP
333108	T	C	coding	TPFB_0316	NON	nonconservative	Y	R	SNP
333109	A	G	coding	TPFB_0316					SNP
333199	C	T	coding	TPFB_0316	NON	nonconservative	D	N	SNP
342126	T	C	coding	TPFB_0324	NON	nonconservative	S	P	SNP
342450	A	C	coding	TPFB_0324	NON	nonconservative	S	R	SNP
343248	A	C	coding	TPFB_0324	NON	nonconservative	M	L	SNP
345775	A	G	coding	TPFB_0324	NON	nonconservative	D	G	SNP
346413	T	C	coding	TPFB_0326	NON	nonconservative	F	S	SNP
372913	C	T	coding	TPFB_0345a	NON	nonconservative	P	L	SNP
372920	T	C	coding	TPFB_0345a	SYN		C	C	SNP
373484	T	C	coding	TPFB_0346	NON	nonconservative	I	T	SNP
373747	G	-	coding	TPFB_0347	INZ-frameshift				2 bp insertion
373748	G	-	coding	TPFB_0347
374487	G	-	intergenic		IGR				2 bp insertion
374488	G	-	intergenic		IGR
396148	-	G	coding	TPFB_0370	DEL		-	D	6 bp deletion
396148	-	T	coding	TPFB_0370			-	D
396148	-	C	coding	TPFB_0370
396148	-	A	coding	TPFB_0370
396148	-	T	coding	TPFB_0370
396149	-	C	coding	TPFB_0370
406913	C	-	intergenic		IGR				2 bp insertion
406914	C	-	intergenic		IGR
409641	-	C	intergenic		IGR				2 bp deletion
409642	-	C	intergenic		IGR
425081	C	T	coding	TPFB_0399	SYN		L	L	SNP
454590	A	G	coding	TPFB_0425	SYN		V	V	SNP
488933	A	G	coding	TPFB_0457	NON	nonconservative	T	A	SNP
493014	-	G	coding	TPFB_0461a	DEL-frameshift				1 bp deletion
493394	G	-	coding	TPFB_0462	INZ		G	-	3 bp insertion
493395	G	-	coding	TPFB_0462
493396	G	-	coding	TPFB_0462
494190	A	G	coding	TPFB_0463	NON	nonconservative	S	G	SNP
517700	-	A	coding	TPFB_0484	DEL-frameshift				1 bp deletion
523729	A	G	coding	TPFB_0488	NON	nonconservative	T	A	SNP
523769	A	G	coding	TPFB_0488	NON	nonconservative	Q	R	SNP
524030	T	C	coding	TPFB_0488	NON	nonconservative	L	S	SNP
525356	G	A	coding	TPFB_0488	NON	nonconservative	G	D	SNP
540009	G	T	coding	TPFB_0502	SYN		A	A	SNP
585208	A	G	coding	TPFB_0541	SYN		L	L	SNP
591365	T	C	coding	TPFB_0546	SYN		L	L	SNP
594091	-	C	coding	TPFB_0548	DEL		-	14 aminoacids	42 bp deletion
594091	-	G	coding	TPFB_0548
594091	-	T	coding	TPFB_0548
594091	-	G	coding	TPFB_0548
594091	-	G	coding	TPFB_0548
594091	-	T	coding	TPFB_0548
594091	-	A	coding	TPFB_0548
594091	-	T	coding	TPFB_0548
594091	-	G	coding	TPFB_0548
594091	-	C	coding	TPFB_0548
594091	-	A	coding	TPFB_0548
594091	-	G	coding	TPFB_0548
594091	-	G	coding	TPFB_0548
594091	-	C	coding	TPFB_0548
594091	-	G	coding	TPFB_0548
594091	-	G	coding	TPFB_0548
594091	-	C	coding	TPFB_0548
594091	-	A	coding	TPFB_0548
594091	-	G	coding	TPFB_0548
594091	-	T	coding	TPFB_0548
594091	-	G	coding	TPFB_0548
594091	-	G	coding	TPFB_0548
594091	-	C	coding	TPFB_0548
594091	-	C	coding	TPFB_0548
594091	-	G	coding	TPFB_0548
594091	-	C	coding	TPFB_0548
594091	-	A	coding	TPFB_0548
594091	-	C	coding	TPFB_0548
594091	-	G	coding	TPFB_0548
594091	-	C	coding	TPFB_0548
594091	-	G	coding	TPFB_0548
594091	-	C	coding	TPFB_0548
594091	-	T	coding	TPFB_0548
594091	-	G	coding	TPFB_0548
594091	-	G	coding	TPFB_0548
594091	-	A	coding	TPFB_0548
594091	-	G	coding	TPFB_0548
594091	-	A	coding	TPFB_0548
594091	-	G	coding	TPFB_0548
594091	-	T	coding	TPFB_0548
594091	-	C	coding	TPFB_0548
594092	-	C	coding	TPFB_0548
595033	G	A	coding	TPFB_0548	NON	nonconservative	R	Q	SNP
606638	C	T	coding	TPFB_0558	SYN		A	A	SNP
630702	T	C	coding	TPFB_0577	NON	nonconservative	S	P	SNP
630712	T	C	coding	TPFB_0577	NON	nonconservative	L	P	SNP
636174	G	A	coding	TPFB_0584	NON	nonconservative	S	N	SNP
650042	C	T	coding	TPFB_0596	NON	nonconservative	D	N	SNP
660899	C	G	coding	TPFB_0608	SYN		P	P	SNP
673711	C	T	coding	TPFB_0620	NON	nonconservative	D	N	SNP
673716	A	G	coding	TPFB_0620	NON	nonconservative	L	P	SNP
674121	T	C	coding	TPFB_0620	NON	nonconservative	Q	R	SNP
674262	T	C	coding	TPFB_0620	NON	nonconservative	Y	C	SNP
674263	A	G	coding	TPFB_0620	NON	nonconservative	Y	H	SNP
674353	C	T	coding	TPFB_0620	NON	nonconservative	D	N	SNP
677537	-	C	intergenic		IGR				1 bp deletion
700639	T	C	coding	TPFB_0639	NON	nonconservative	C	R	SNP
703788	G	A	coding	TPFB_0640	NON	nonconservative	V	I	SNP
727803	G	A	intergenic		IGR				SNP
743072	G	A	coding	TPFB_0675	NON	nonconservative	C	Y	SNP
760088	A	C	coding	TPFB_0690	NON	nonconservative	Y	D	SNP
767396	G	-	intergenic						430 bp insertion
767397	G	-	intergenic
767398	A	-	intergenic
767399	A	-	intergenic
767400	C	-	intergenic
767401	G	-	intergenic
767402	C	-	intergenic
767403	G	-	intergenic
767404	C	-	intergenic
767405	A	-	intergenic
767406	C	-	intergenic
767407	G	-	intergenic
767408	C	-	intergenic
767409	G	-	intergenic
767410	C	-	intergenic
767411	G	-	intergenic
767412	T	-	intergenic
767413	G	-	intergenic
767414	C	-	intergenic
767415	G	-	intergenic
767416	C	-	intergenic
767417	G	-	intergenic
767418	C	-	intergenic
767419	A	-	intergenic
767420	T	-	intergenic
767421	A	-	intergenic
767422	C	-	intergenic
767423	C	-	intergenic
767424	C	-	intergenic
767425	C	-	intergenic
767426	A	-	intergenic
767427	C	-	intergenic
767428	C	-	intergenic
767429	C	-	intergenic
767430	C	-	intergenic
767431	A	-	intergenic
767432	G	-	intergenic
767433	C	-	intergenic
767434	A	-	intergenic
767435	G	-	intergenic
767436	C	-	intergenic
767437	A	-	intergenic
767438	C	-	intergenic
767439	A	-	intergenic
767440	A	-	intergenic
767441	G	-	intergenic
767442	C	-	intergenic
767443	T	-	intergenic
767444	A	-	intergenic
767445	G	-	intergenic
767446	A	-	intergenic
767447	C	-	intergenic
767448	C	-	intergenic
767449	C	-	intergenic
767450	G	-	intergenic
767451	G	-	intergenic
767452	A	-	intergenic
767453	A	-	intergenic
767454	C	-	intergenic
767455	A	-	intergenic
767456	C	-	intergenic
767457	A	-	intergenic
767458	G	-	intergenic
767459	G	-	intergenic
767460	C	-	intergenic
767461	C	-	intergenic
767462	C	-	intergenic
767463	T	-	intergenic
767464	A	-	intergenic
767465	T	-	intergenic
767466	C	-	intergenic
767467	T	-	intergenic
767468	G	-	intergenic
767469	C	-	intergenic
767470	A	-	intergenic
767471	C	-	intergenic
767472	C	-	intergenic
767473	G	-	intergenic
767474	T	-	intergenic
767475	C	-	intergenic
767476	A	-	intergenic
767477	G	-	intergenic
767478	C	-	intergenic
767479	G	-	intergenic
767480	G	-	intergenic
767481	A	-	intergenic
767482	C	-	intergenic
767483	A	-	intergenic
767484	C	-	intergenic
767485	T	-	intergenic
767486	C	-	intergenic
767487	C	-	intergenic
767488	A	-	intergenic
767489	A	-	intergenic
767490	A	-	intergenic
767491	C	-	intergenic
767492	A	-	intergenic
767493	A	-	intergenic
767494	T	-	intergenic
767495	A	-	intergenic
767496	C	-	intergenic
767497	T	-	intergenic
767498	T	-	intergenic
767499	T	-	intergenic
767500	T	-	intergenic
767501	G	-	intergenic
767502	C	-	intergenic
767503	A	-	intergenic
767504	A	-	intergenic
767505	A	-	intergenic
767506	A	-	intergenic
767507	A	-	intergenic
767508	C	-	intergenic
767509	T	-	intergenic
767510	G	-	intergenic
767511	T	-	intergenic
767512	T	-	intergenic
767513	C	-	intergenic
767514	C	-	intergenic
767515	C	-	intergenic
767516	A	-	intergenic
767517	T	-	intergenic
767518	T	-	intergenic
767519	T	-	intergenic
767520	C	-	intergenic
767521	A	-	intergenic
767522	A	-	intergenic
767523	A	-	intergenic
767524	T	-	intergenic
767525	C	-	intergenic
767526	A	-	intergenic
767527	G	-	intergenic
767528	T	-	intergenic
767529	G	-	intergenic
767530	G	-	intergenic
767531	A	-	intergenic
767532	G	-	intergenic
767533	C	-	intergenic
767534	C	-	intergenic
767535	T	-	intergenic
767536	G	-	intergenic
767537	C	-	intergenic
767538	G	-	intergenic
767539	C	-	intergenic
767540	C	-	intergenic
767541	G	-	intergenic
767542	T	-	intergenic
767543	T	-	intergenic
767544	C	-	intergenic
767545	T	-	intergenic
767546	T	-	intergenic
767547	A	-	intergenic
767548	C	-	intergenic
767549	A	-	intergenic
767550	C	-	intergenic
767551	T	-	intergenic
767552	G	-	intergenic
767553	C	-	intergenic
767554	T	-	intergenic
767555	C	-	intergenic
767556	G	-	intergenic
767557	A	-	intergenic
767558	G	-	intergenic
767559	G	-	intergenic
767560	T	-	intergenic
767561	T	-	intergenic
767562	C	-	intergenic
767563	G	-	intergenic
767564	C	-	intergenic
767565	A	-	intergenic
767566	G	-	intergenic
767567	T	-	intergenic
767568	A	-	intergenic
767569	A	-	intergenic
767570	T	-	intergenic
767571	C	-	intergenic
767572	G	-	intergenic
767573	G	-	intergenic
767574	G	-	intergenic
767575	A	-	intergenic
767576	T	-	intergenic
767577	A	-	intergenic
767578	C	-	intergenic
767579	C	-	intergenic
767580	C	-	intergenic
767581	A	-	intergenic
767582	C	-	intergenic
767583	A	-	intergenic
767584	C	-	intergenic
767585	C	-	intergenic
767586	G	-	intergenic
767587	C	-	intergenic
767588	T	-	intergenic
767589	T	-	intergenic
767590	G	-	intergenic
767591	C	-	intergenic
767592	C	-	intergenic
767593	A	-	intergenic
767594	C	-	intergenic
767595	A	-	intergenic
767596	C	-	intergenic
767597	C	-	intergenic
767598	G	-	intergenic
767599	A	-	intergenic
767600	C	-	intergenic
767601	A	-	intergenic
767602	G	-	intergenic
767603	A	-	intergenic
767604	C	-	intergenic
767605	A	-	intergenic
767606	G	-	intergenic
767607	T	-	intergenic
767608	C	-	intergenic
767609	C	-	intergenic
767610	C	-	intergenic
767611	A	-	intergenic
767612	C	-	intergenic
767613	A	-	intergenic
767614	A	-	intergenic
767615	C	-	intergenic
767616	C	-	intergenic
767617	C	-	intergenic
767618	C	-	intergenic
767619	C	-	intergenic
767620	G	-	intergenic
767621	T	-	intergenic
767622	A	-	intergenic
767623	A	-	intergenic
767624	A	-	intergenic
767625	G	-	intergenic
767626	G	-	intergenic
767627	G	-	intergenic
767628	G	-	intergenic
767629	T	-	intergenic
767630	G	-	intergenic
767631	C	-	intergenic
767632	G	-	intergenic
767633	C	-	intergenic
767634	A	-	intergenic
767635	A	-	intergenic
767636	C	-	intergenic
767637	G	-	intergenic
767638	T	-	intergenic
767639	G	-	intergenic
767640	C	-	intergenic
767641	A	-	intergenic
767642	T	-	intergenic
767643	C	-	intergenic
767644	C	-	intergenic
767645	G	-	intergenic
767646	C	-	intergenic
767647	G	-	intergenic
767648	G	-	intergenic
767649	G	-	intergenic
767650	T	-	intergenic
767651	G	-	intergenic
767652	C	-	intergenic
767653	C	-	intergenic
767654	G	-	intergenic
767655	A	-	intergenic
767656	T	-	intergenic
767657	C	-	intergenic
767658	G	-	intergenic
767659	C	-	intergenic
767660	A	-	intergenic
767661	A	-	intergenic
767662	C	-	intergenic
767663	T	-	intergenic
767664	T	-	intergenic
767665	A	-	intergenic
767666	C	-	intergenic
767667	G	-	intergenic
767668	T	-	intergenic
767669	A	-	intergenic
767670	C	-	intergenic
767671	A	-	intergenic
767672	A	-	intergenic
767673	T	-	intergenic
767674	G	-	intergenic
767675	C	-	intergenic
767676	A	-	intergenic
767677	T	-	intergenic
767678	C	-	intergenic
767679	C	-	intergenic
767680	A	-	intergenic
767681	C	-	intergenic
767682	A	-	intergenic
767683	T	-	intergenic
767684	G	-	intergenic
767685	C	-	intergenic
767686	G	-	intergenic
767687	C	-	intergenic
767688	A	-	intergenic
767689	G	-	intergenic
767690	C	-	intergenic
767691	G	-	intergenic
767692	T	-	intergenic
767693	G	-	intergenic
767694	C	-	intergenic
767695	A	-	intergenic
767696	C	-	intergenic
767697	G	-	intergenic
767698	C	-	intergenic
767699	G	-	intergenic
767700	C	-	intergenic
767701	A	-	intergenic
767702	A	-	intergenic
767703	G	-	intergenic
767704	A	-	intergenic
767705	A	-	intergenic
767706	C	-	intergenic
767707	T	-	intergenic
767708	C	-	intergenic
767709	A	-	intergenic
767710	G	-	intergenic
767711	C	-	intergenic
767712	A	-	intergenic
767713	A	-	intergenic
767714	C	-	intergenic
767715	G	-	intergenic
767716	C	-	intergenic
767717	G	-	intergenic
767718	C	-	intergenic
767719	A	-	intergenic
767720	C	-	intergenic
767721	A	-	intergenic
767722	C	-	intergenic
767723	A	-	intergenic
767724	G	-	intergenic
767725	T	-	intergenic
767726	C	-	intergenic
767727	C	-	intergenic
767728	T	-	intergenic
767729	G	-	intergenic
767730	A	-	intergenic
767731	T	-	intergenic
767732	C	-	intergenic
767733	C	-	intergenic
767734	G	-	intergenic
767735	C	-	intergenic
767736	G	-	intergenic
767737	C	-	intergenic
767738	C	-	intergenic
767739	G	-	intergenic
767740	G	-	intergenic
767741	G	-	intergenic
767742	A	-	intergenic
767743	A	-	intergenic
767744	C	-	intergenic
767745	G	-	intergenic
767746	A	-	intergenic
767747	A	-	intergenic
767748	C	-	intergenic
767749	A	-	intergenic
767750	A	-	intergenic
767751	C	-	intergenic
767752	G	-	intergenic
767753	C	-	intergenic
767754	A	-	intergenic
767755	C	-	intergenic
767756	C	-	intergenic
767757	G	-	intergenic
767758	C	-	intergenic
767759	G	-	intergenic
767760	T	-	intergenic
767761	G	-	intergenic
767762	G	-	intergenic
767763	A	-	intergenic
767764	T	-	intergenic
767765	C	-	intergenic
767766	G	-	intergenic
767767	C	-	intergenic
767768	A	-	intergenic
767769	A	-	intergenic
767770	A	-	intergenic
767771	A	-	intergenic
767772	A	-	intergenic
767773	T	-	intergenic
767774	C	-	intergenic
767775	A	-	intergenic
767776	T	-	intergenic
767777	T	-	intergenic
767778	T	-	intergenic
767779	T	-	intergenic
767780	G	-	intergenic
767781	A	-	intergenic
767782	A	-	intergenic
767783	A	-	intergenic
767784	A	-	intergenic
767785	T	-	intergenic
767786	C	-	intergenic
767787	A	-	intergenic
767788	A	-	intergenic
767789	C	-	intergenic
767790	C	-	intergenic
767791	A	-	intergenic
767792	A	-	intergenic
767793	A	-	intergenic
767794	A	-	intergenic
767795	A	-	intergenic
767796	A	-	intergenic
767797	A	-	intergenic
767798	A	-	intergenic
767799	G	-	intergenic
767800	G	-	intergenic
767801	C	-	intergenic
767802	T	-	intergenic
767803	C	-	intergenic
767804	T	-	intergenic
767805	G	-	intergenic
767806	C	-	intergenic
767807	T	-	intergenic
767808	C	-	intergenic
767809	A	-	intergenic
767810	T	-	intergenic
767811	A	-	intergenic
767812	G	-	intergenic
767813	G	-	intergenic
767814	G	-	intergenic
767815	A	-	intergenic
767816	A	-	intergenic
767817	G	-	intergenic
767818	C	-	intergenic
767819	G	-	intergenic
767820	C	-	intergenic
767821	G	-	intergenic
767822	C	-	intergenic
767823	G	-	intergenic
767824	C	-	intergenic
767825	A	-	intergenic
798522	C	T	coding	TPFB_0730	NON	nonconservative	L	F	SNP
801328	A	G	coding	TPFB_0733	NON	nonconservative	R	G	SNP
801349	C	T	coding	TPFB_0733	NON	nonconservative	P	S	SNP
855861	A	G	coding	TPFB_0787	SYN		L	L	SNP
888576	G	T	coding	TPFB_0817	NON	conservative	D	E	SNP
928417	T	A	coding	TPFB_0854	NON	nonconservative	I	F	SNP
936307	C	G	coding	TPFB_0856	NON	conservative	A	G	SNP
936308	T	C	coding	TPFB_0856					SNP
936310	G	T	coding	TPFB_0856	NON	nonconservative	W	L	SNP
937211	A	C	coding	TPFB_0856a	NON/NON	nonconservative/nonconservative	I/N	M/H	SNP
937445	G	C	coding	TPFB_0856a	NON/NON	nonconservative/nonconservative	H /V	Q/L	SNP
938535	T	C	coding	TPFB_0859	NON	nonconservative	L	S	SNP
939139	-	G	coding	TPFB_0859	DEL		-	G	3 bp deletion
939139	-	G	coding	TPFB_0859
939140	-	G	coding	TPFB_0859
940551	C	T	coding	TPFB_0861	NON	nonconservative	R	H	SNP
941123	A	G	coding	TPFB_0861	SYN		A	A	SNP
946069	T	C	coding	TPFB_0864	SYN		A	A	SNP
946841	C	G	coding	TPFB_0865	NON	nonconservative	G	S	SNP
946842	C	A	coding	TPFB_0865					SNP
946844	A	T	coding	TPFB_0865	NON	nonconservative	L	E (SD), D	SNP
946845	G	C	coding	TPFB_0865					SNP
946847	C	T	coding	TPFB_0865	NON	nonconservative, conservative	R	N, K(GT)	SNP
946848	G	T	coding	TPFB_0865					SNP
972710	G	T	coding	TPFB_0891	NON	nonconservative	T	K	SNP
976990	C	T	coding	TPFB_0896	NON	nonconservative	V	M	SNP
976993	A	G	coding	TPFB_0896	NON	nonconservative	Y	H	SNP
977036	A	T	coding (intergenic)	TPFB_0896	IGR			L	SNP
977038	T	A	coding (intergenic)	TPFB_0896					SNP
977039	T	A	coding (intergenic)	TPFB_0896	nonsense mutation		*	N	SNP
977041	A	T	coding (intergenic)	TPFB_0896					SNP
985974	T	C	coding	TPFB_0901	NON	nonconservative	T	A	SNP
1034780	G	A	coding	TPFB_0949a	NON	nonconservative	H	Y	SNP
1036094	T	C	coding	TPFB_0952	NON	nonconservative	D	G	SNP
1041824	A	G	coding	TPFB_0957	NON	nonconservative	H	R	SNP
1051534	A	C	coding	TPFB_0966	NON	conservative	V	G	SNP
1053293	A	G	coding	TPFB_0967	NON	nonconservative	F	S	SNP
1053676	A	G	coding	TPFB_0968	NON	conservative	V	A	SNP
1053893	T	C	coding	TPFB_0968	NON	nonconservative	K	E	SNP
1054025	C	T	coding	TPFB_0968	NON	nonconservative	E	K	SNP
1055233	T	C	coding	TPFB_0968	NON	nonconservative	R	G	SNP
1088215	C	T	coding	TPFB_0998	NON	nonconservative	V	I	SNP
1100256	C	T	coding	TPFB_1007	NON	conservative	R	K	SNP
1129551	T	C	coding	TPFB_1033	SYN		R	R	SNP
